# Supplementary material
Source: publisher figshare collection journal article supplement (https://acs.figshare.com/ndownloader/files/3586032)
Supplement: Supplementary file 1 [file 3586032]

# Gas-Phase Structure and Dissociation Chemistry of Protonated Tryptophan Elucidated by Infrared Multiple-Photon Dissociation Spectroscopy

Warren K. Mino, Kerim Gulyuz, Da Wang, Corey Stedwell, Nick C. Polfer

Department of Chemistry, University of Florida, P.O. Box 117200, Gainesville, FL 32611,  
U.S.A.

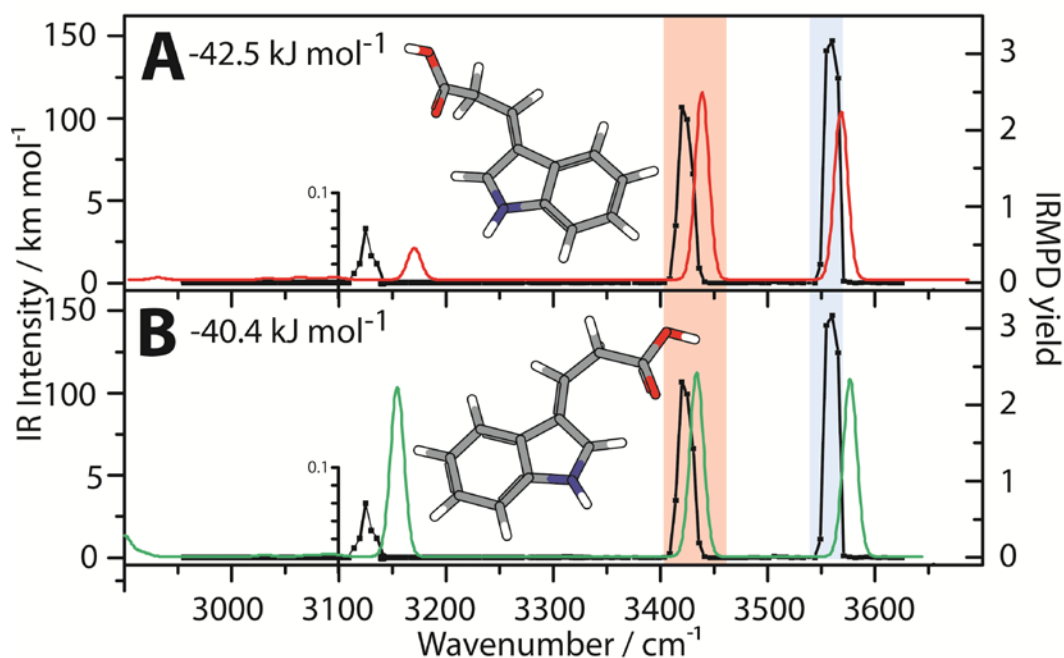

**Figure S1.** Comparison of  $[\text{Trp}+\text{H}-\text{NH}_3]^+$  IRMPD spectrum (black) to calculated spectra (different colors) for lowest-energy benzyl cation conformers. Zero-point energy corrected energies at the B3LYP/6-31+G\* level are indicated.

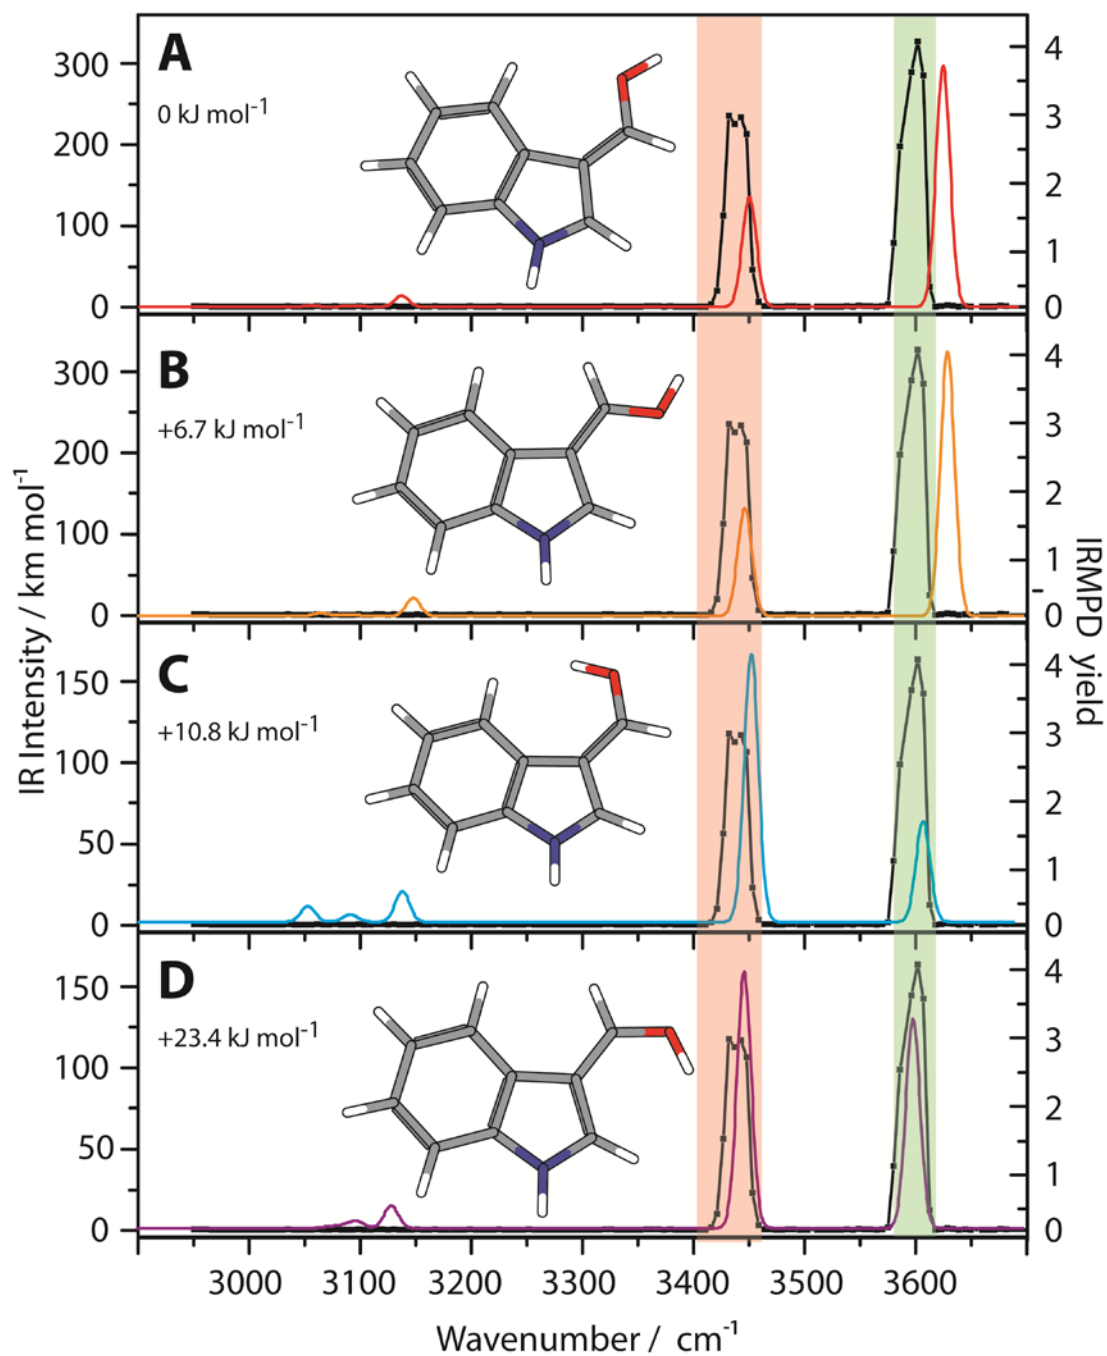

**Figure S2.** Comparison of  $[\text{Trp}+\text{H}-\text{NH}_3-\text{C}_2\text{H}_2\text{O}]^+$  IRMPD spectrum (black) to theoretical spectra (different colors) of putative rotamers. Zero-point energy corrected energies at the B3LYP/6-31+G\* level are indicated.

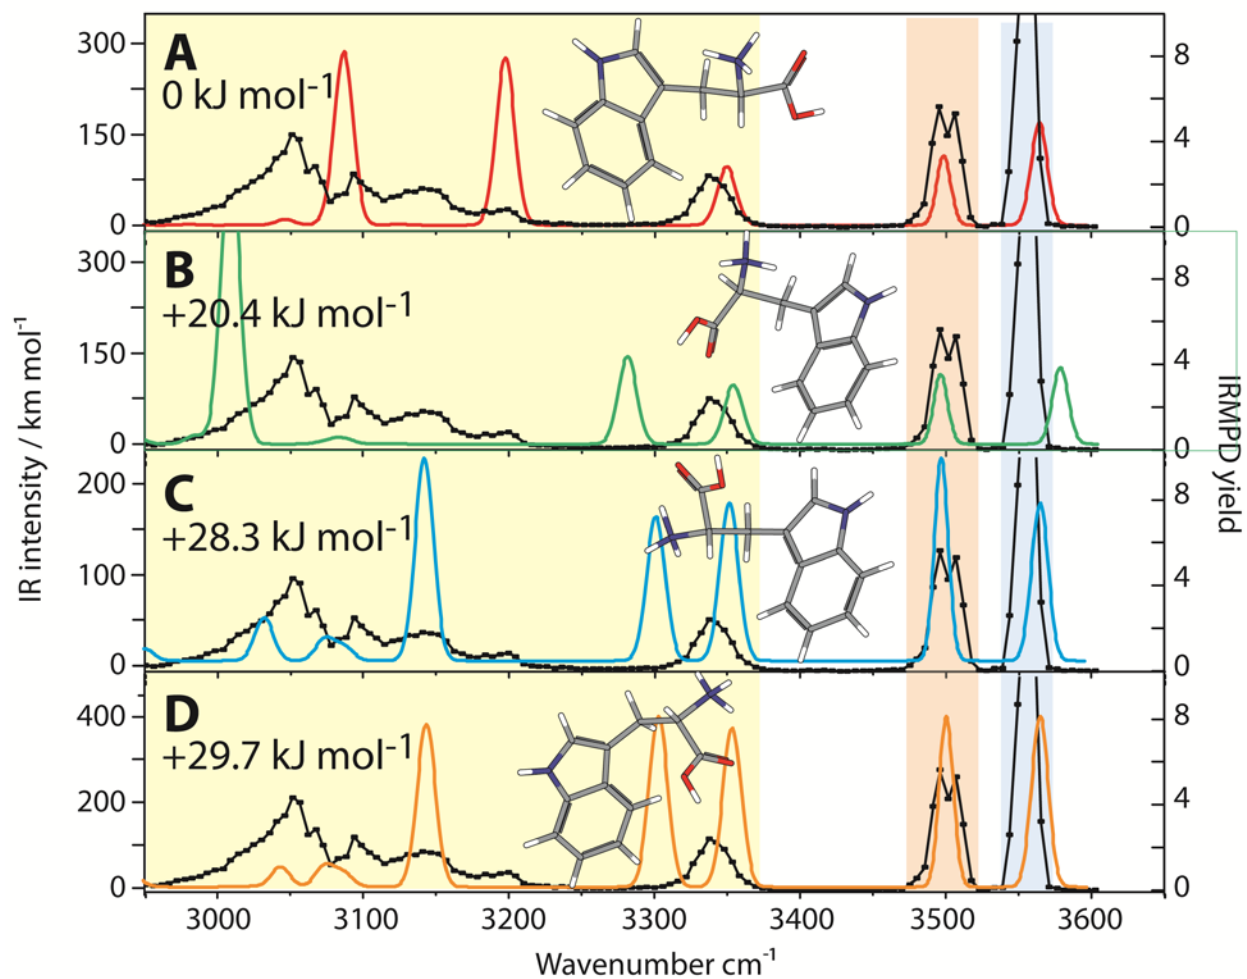

**Figure S3.** Comparison of TrpH<sup>+</sup> IRMPD spectrum (black) to (A) lowest-energy conformer, and (B-D) higher-energy conformers (in different colors). Zero-point energy corrected energies at the B3LYP/6-31+G\* level are indicated.

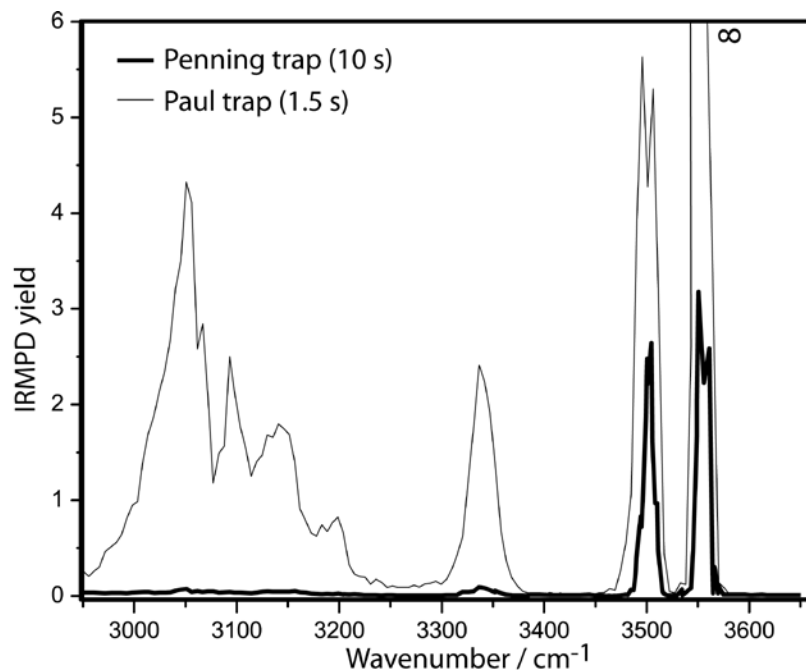

**Figure S4.** Comparison of IRMPD spectra of  $\text{TrpH}^+$  in the Penning trap of a commercial Fourier transform ion cyclotron resonance (FTICR) mass spectrometer (4.7 T Apex II, Bruker Daltonics) and the “Paul-type” 3D ion trap of the custom-built mass spectrometer presented here. The ion cloud was irradiated with the tunable cw OPO laser for 10 s and 1.5 s, respectively. The laser fluxes in both experiments were estimated at  $280 \text{ mW/cm}^2$  (Penning trap) and  $280 \text{ W/cm}^2$  (Paul trap). These values are based on the measured beam waist for a 7.1 cm focal length lens.

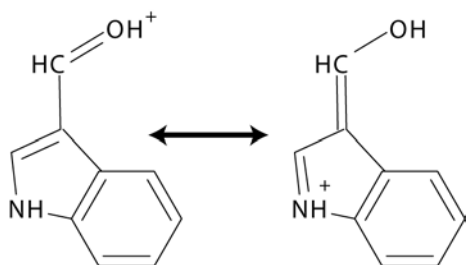

**Scheme S5.** Resonance structures of  $[\text{Trp}+\text{H}-\text{NH}_3-\text{CH}_2\text{CO}]^+$  ( $m/z$  146) structure.

**Table S6.** Summary of B3LYP/6-31+G\*, M05-2X/6-31+G\* and (single-point) MP2/6-31+G\* energies. Note that all zero-point energy (ZPE) and Gibbs (298K) free energy corrections were done using the frequency calculations at B3LYP/6-31+G\*. The structures in Fig S3 C+D could not be optimized at the MP2 level of theory.

| Structure                                                  | B3LYP                        |                            |                              | M05-2X                       |                            |                              | MP2                          |                            |
|------------------------------------------------------------|------------------------------|----------------------------|------------------------------|------------------------------|----------------------------|------------------------------|------------------------------|----------------------------|
|                                                            | Electronic energy / Hartrees | ZPE / kJ mol <sup>-1</sup> | Gibbs / kJ mol <sup>-1</sup> | Electronic energy / Hartrees | ZPE / kJ mol <sup>-1</sup> | Gibbs / kJ mol <sup>-1</sup> | Electronic energy / Hartrees | ZPE / kJ mol <sup>-1</sup> |
| <b>TrpH<sup>+</sup></b>                                    |                              |                            |                              |                              |                            |                              |                              |                            |
| Fig 3 A                                                    | -686.76174                   | 0.000                      | 0.000                        | -686.68491                   | 2.765                      | 0.627                        | -682.56524                   | 4.012                      |
| B                                                          | -686.76170                   | 0.536                      | 1.444                        | -686.68443                   | 1.405                      | 3.880                        | -682.56500                   | 2.045                      |
| C                                                          | -686.76097                   | 2.114                      | 2.631                        | -686.68620                   | 0.000                      | 0.000                        | -682.56420                   | 0.000                      |
| D                                                          | -686.75890                   | 7.341                      | 8.622                        | -686.68252                   | 8.845                      | 7.848                        | -682.56080                   | 7.073                      |
| FigS3 A                                                    | -686.76174                   | 0.000                      | 0.000                        | -686.68491                   | 2.765                      | 0.627                        | -682.56524                   | 4.012                      |
| B                                                          | -686.75379                   | 20.426                     | 21.206                       | -686.67804                   | 21.177                     | 20.702                       | -682.55584                   | 17.588                     |
| C                                                          | -686.75075                   | 28.274                     | 27.219                       | -686.67280                   | 34.525                     | 31.981                       | -682.55469                   | N/A                        |
| D                                                          | -686.75024                   | 29.734                     | 29.923                       | -686.67360                   | 32.244                     | 31.104                       | -682.55435                   | N/A                        |
| <b>[Trp+H-NH<sub>3</sub>]<sup>+</sup></b>                  |                              |                            |                              |                              |                            |                              |                              |                            |
| Fig 2 A                                                    | -630.13190                   | 81.782                     | 81.645                       |                              |                            |                              |                              |                            |
| B                                                          | -630.15989                   | 9.757                      | 9.848                        |                              |                            |                              |                              |                            |
| C                                                          | -630.16351                   | 0.000                      | 0.000                        |                              |                            |                              |                              |                            |
| D                                                          | -630.13598                   | 72.561                     | 72.810                       |                              |                            |                              |                              |                            |
| Fig S1 A                                                   | -630.17946                   | -42.491                    | -46.327                      |                              |                            |                              |                              |                            |
| B                                                          | -630.17822                   | -40.385                    | -46.311                      |                              |                            |                              |                              |                            |
| <b>[Trp+H-NH<sub>3</sub>-CH<sub>2</sub>CO]<sup>+</sup></b> |                              |                            |                              |                              |                            |                              |                              |                            |
| Fig 2 E                                                    | -477.52127                   | 0.000                      | 0.000                        | -477.46255                   | 0.000                      | 0.000                        |                              |                            |
| FigS3 A                                                    | -477.52127                   | 0.000                      | 0.000                        | -477.46255                   | 0.000                      | 0.000                        |                              |                            |
| B                                                          | -477.51846                   | 6.664                      | 6.364                        | -477.45994                   | 7.126                      | 7.273                        |                              |                            |
| C                                                          | -477.51690                   | 10.788                     | 10.056                       | -477.45841                   | 10.691                     | 9.930                        |                              |                            |
| D                                                          | -477.51198                   | 23.370                     | 22.816                       | -477.45841                   | 24.601                     | 24.349                       |                              |                            |
